# Supplementary material
Source: MDPI journal article supplement (https://www.mdpi.com/2297-8739/10/11/566)
Supplement: s1 [file s1 › separations-2662056-supplementary.pdf]

# Supplementary Materials

**Table S1.** Decomposition standard compounds analyzed and their retention times using the current optimized stage 2 method and instrumentation. Note: over the course of the study, the major peaks of all the standards appeared within  $\pm 5$  s in 1D and  $\pm 0.1$  s in 2D from the retention values listed below.

| Standard mix   | Name                      | 1st Dimension retention time (s) | 2nd Dimension retention time (s) |
|----------------|---------------------------|----------------------------------|----------------------------------|
| Standard mix 8 | Formaldehyde              | 89.9981                          | 0.481                            |
|                | Butanal, 3-methyl-        | 409.978                          | 0.594                            |
|                | Pentanal                  | 499.972                          | 0.622                            |
|                | Hexanal                   | 764.955                          | 0.653                            |
|                | Heptanal                  | 1049.94                          | 0.668                            |
|                | Octanal                   | 1329.92                          | 0.684                            |
|                | 2-Octenal, (E)-           | 1514.91                          | 0.763                            |
|                | Nonanal                   | 1594.9                           | 0.699                            |
|                | Decanal                   | 1844.89                          | 0.718                            |
| Standard mix 2 | Furan, 2-methyl-          | 279.986                          | 0.569                            |
|                | 2-Butanol                 | 324.983                          | 0.723                            |
|                | 1-Butanol                 | 459.974                          | 0.862                            |
|                | 3-Pentanol                | 529.97                           | 0.743                            |
|                | Disulfide, dimethyl       | 589.966                          | 0.682                            |
|                | 1-Pentanol                | 714.958                          | 0.881                            |
|                | Dimethyl trisulfide       | 1219.93                          | 0.817                            |
|                | Furan, 2-pentyl-          | 1229.93                          | 0.653                            |
|                | Indole                    | 2229.86                          | 2.371                            |
| Standard mix 1 | Acetic acid, methyl ester | 199.991                          | 0.56                             |
|                | Acetic acid ethyl ester   | 309.984                          | 0.577                            |
|                | 2-Butanone, 3-methyl-     | 419.977                          | 0.593                            |
|                | 2-Pentanone               | 484.973                          | 0.617                            |
|                | Methyl Isobutyl Ketone    | 609.965                          | 0.615                            |
|                | 2-Heptanone               | 1024.94                          | 0.664                            |
|                | Butyrolactone             | 1254.92                          | 1.342                            |

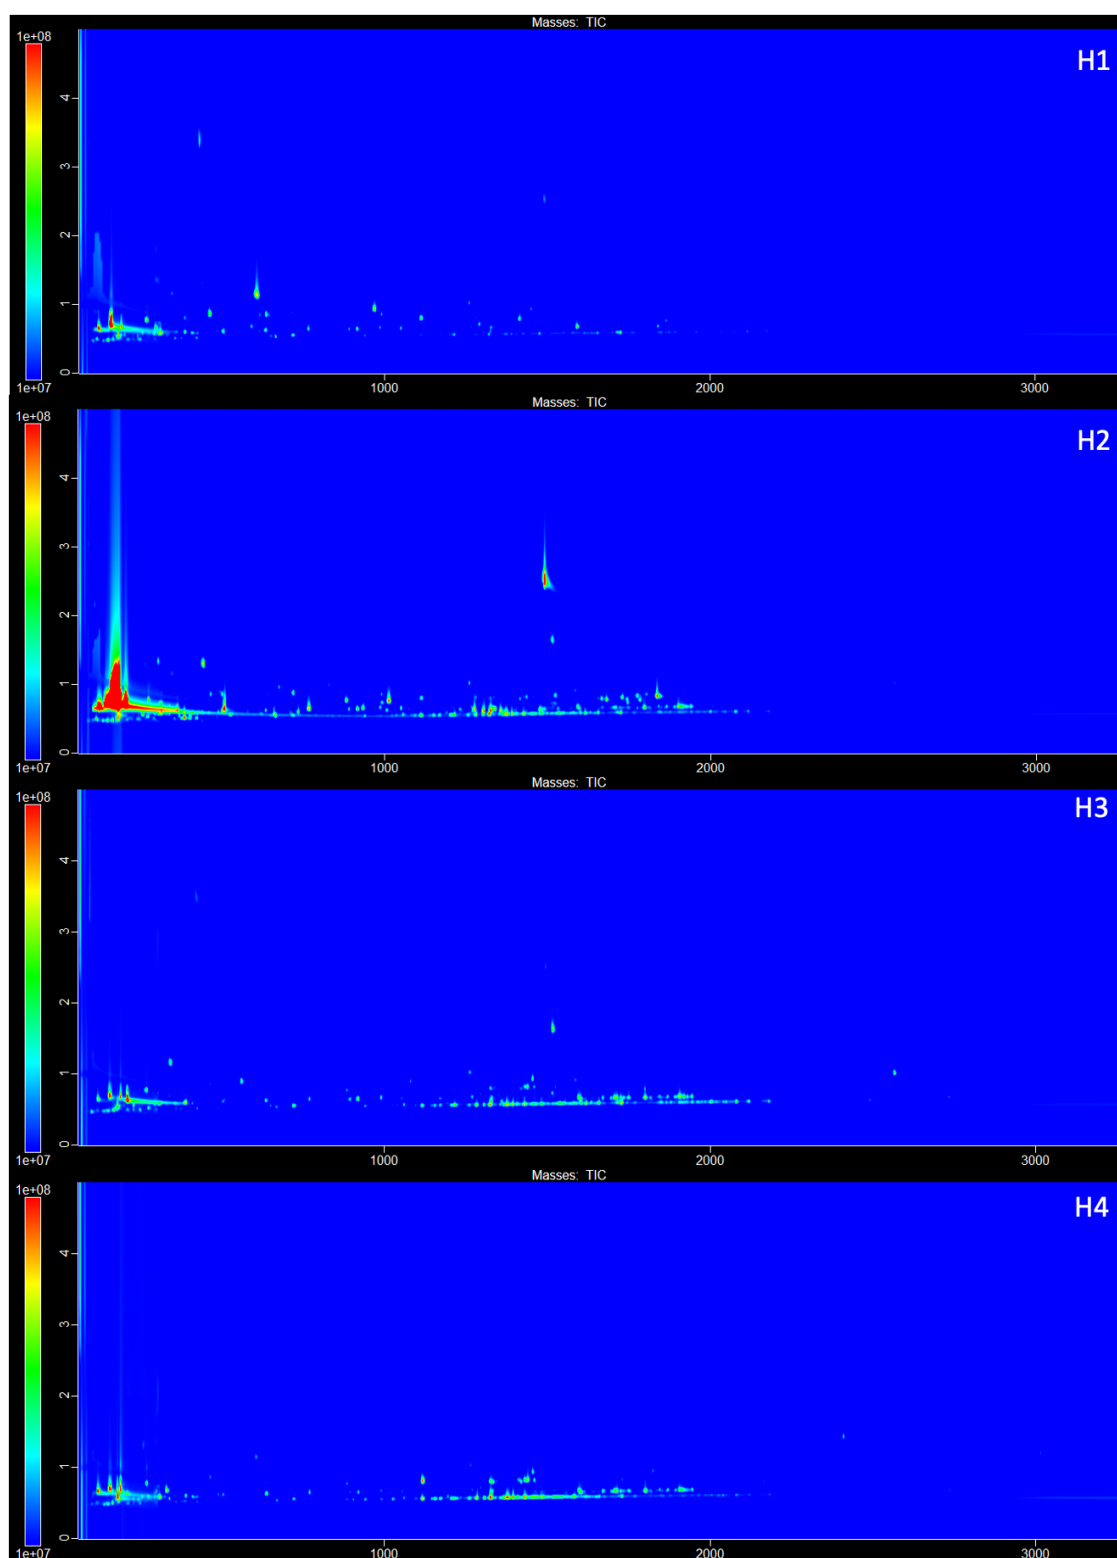

**Figure S1.** GCxGC-TOFMS total ion current (TIC) contour plots of headspace VOC samples collected from donors H1, H2, H3 and H4.

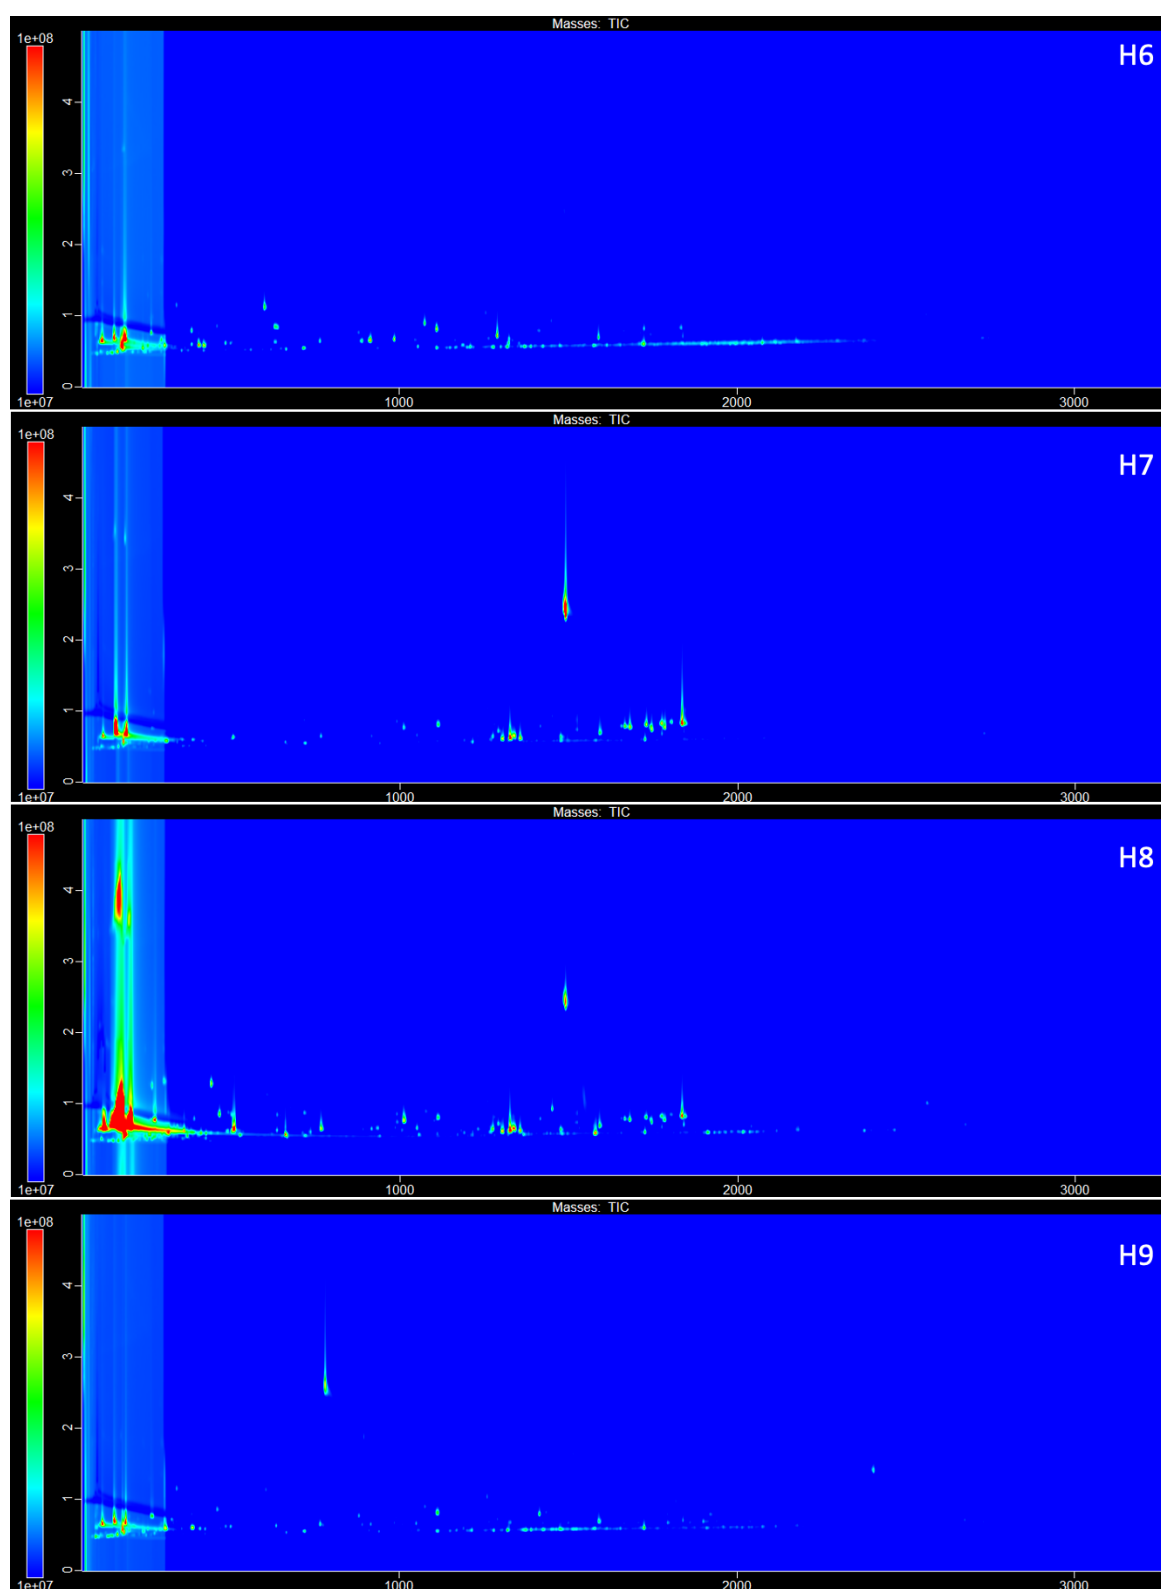

**Figure S2.** GCxGC-TOFMS total ion current (TIC) contour plots of headspace VOC samples collected from donors H6, H7, H8 and H9.

**Table S2.** List of compounds related to decomposition identified in lower PMI donors causing their separation and clustering in the scores plot made with seven donors. These compounds were located closest to the outer ellipses on the correlations loadings plot indicating a strong association and correlation with the donors causing variance in the VOC profiles.

| Donor     | Compound                      | Frequency of detection | Previously reported in decomposition literature |
|-----------|-------------------------------|------------------------|-------------------------------------------------|
| H8        | Heptane,2-4 dimethyl          | 3                      | [27]                                            |
| H8        | Thiocyanic acid, methyl ester | 3                      | [42]                                            |
| H8        | 1H-indene-dihydro-4-methyl    | 3                      | Not detected                                    |
| H8        | Butanal, 3-methyl             | 5                      | [27]                                            |
| H2 and H7 | Terpineol                     | 3                      | [32]                                            |
| H6 and H9 | Acetic acid butyl ester       | 5                      | [43]                                            |
| H6 and H9 | 2-Propenoic acid, butyl ester | 3                      | [43]                                            |
| H6 and H9 | Butanenitrile                 | 3                      | [8,44]                                          |
| H6 and H9 | Butanenitrile 3-methyl        | 3                      | [44]                                            |
| H6 and H9 | 2-pentanol                    | 4                      | [43]                                            |
